# Supplementary material
Source: PubMed Central journal article supplement (PMC5794887)
Supplement: mp2016238x2.pdf [file mp2016238x2.pdf]

| Experiment                                                                        | Measurement                                        | Statistical test                     | Comparison                                                                                                                                    | Statistics              | Degrees of freedom                  | p                                            | Figure         |
|-----------------------------------------------------------------------------------|----------------------------------------------------|--------------------------------------|-----------------------------------------------------------------------------------------------------------------------------------------------|-------------------------|-------------------------------------|----------------------------------------------|----------------|
| Frequencies of 3'UTR miRNA binding sites in putative targets in KARG vs. Genome   | miR-495 targets in KARG vs. Genome                 | Two-tailed Chi Square                | miR-495 % KARG vs. % Genome                                                                                                                   |                         |                                     | <0.0001****                                  | 1A             |
|                                                                                   | miR-495 targets in KARG vs. Genome                 | Two-tailed Chi Square                | miR-212/-132 % KARG vs. % Genome                                                                                                              |                         |                                     | <0.0001****                                  | 1A             |
|                                                                                   | miR-212/132 targets in KARG vs. Genome             | Two-tailed Chi Square                | let-7% KARG vs. % Genome                                                                                                                      |                         |                                     | <0.0001****                                  | 1A             |
| Comparison of percentage of 3'UTR miRNA binding sites in putative targets in KARG | miR-495 vs. miR-212/-132 targets in KARG           | Two-tailed Chi Square                | miR-495 vs. Let-7 % KARG                                                                                                                      |                         |                                     | <0.001****                                   | 1A             |
|                                                                                   | miR-495 vs. let-7 targets in KARG                  | Two-tailed Chi Square                | miR-495 vs. Let-7 % KARG                                                                                                                      |                         |                                     | <0.001****                                   | 1A             |
| KARG Evidence Scores                                                              | Evidence scores                                    | Mann-Whitney                         | miR-495 KARG targets vs. Whole KARG                                                                                                           | U = 36189               | Median miR-495 = 2, Median KARG = 2 |                                              | S1             |
| Dual Luciferase                                                                   | Bdnf-L 3'UTR                                       | One-way ANOVA                        | miR vector                                                                                                                                    | F = 39.4                | 3, 7                                | < 0.01**                                     | 1F             |
|                                                                                   | Bdnf-S 3'UTR                                       | One-way ANOVA                        | miR vector                                                                                                                                    | F = 9.2                 | 3, 7                                | < 0.05*                                      |                |
|                                                                                   | CaMK2a 3'UTR                                       | One-way ANOVA                        | miR vector                                                                                                                                    | F = 156.3               | 3, 7                                | < 0.01**                                     | 1G             |
|                                                                                   | Arc 3'UTR                                          | One-way ANOVA                        | miR vector                                                                                                                                    | F = 137.0               | 3, 7                                | < 0.01**                                     |                |
|                                                                                   | Empty vector controls                              | One-way ANOVA                        | miR vector                                                                                                                                    | F = 1.1                 | 3, 7                                | ns                                           | S3             |
| NAc miR-495 Acute Cocaine Time Course                                             | NAc miR-495                                        | One-way ANOVA<br>Post-Hocs           | Time after cocaine<br>1 h simple test against time 0/saline<br>2 h simple test against time 0/saline<br>4 h simple test against time 0/saline | F = 4.4                 | 6, 42                               | <0.01**<br>< 0.001****<br>< 0.05*<br>< 0.05* | 2A             |
| Acute Cocaine miR-495 qPCR                                                        | mPFC                                               | t test                               | Coc vs. Saline                                                                                                                                | t = 0.53                | 9                                   | ns                                           | 2B             |
|                                                                                   | DS                                                 | t test                               | Coc vs. Saline                                                                                                                                | t = 1.3                 | 12                                  | ns                                           | 2C             |
| NAc mRNA Acute cocaine                                                            | NAc Bdnf-L                                         | t test                               | Coc vs. Saline                                                                                                                                | t = 5.0                 | 7                                   | <0.01**                                      | S4A            |
|                                                                                   | NAc Bdnf-Pan                                       |                                      | Coc vs. Saline                                                                                                                                | t = 3.5                 | 8                                   | <0.01**                                      | S4B            |
|                                                                                   | NAc CaMKIIa                                        |                                      | Coc vs. Saline                                                                                                                                | t = 2.8                 | 10                                  | < 0.05*                                      | 2E             |
| Bdnf Ratio                                                                        | NAc Bdnf-L/Bdnf-Pan mRNA                           | t test                               |                                                                                                                                               | t = 2.4                 | 7                                   | < 0.05*                                      | 2D             |
| Acute Cocaine Westerns NAc                                                        | pro-BDNF                                           | t test                               | Coc vs. Saline                                                                                                                                | t = 2.8                 | 12                                  | < 0.05*                                      | 2F             |
|                                                                                   | matBDNF                                            |                                      | Coc vs Saline                                                                                                                                 | t = 2.4                 | 13                                  | < 0.05*                                      | 2G             |
|                                                                                   | CaMKIIa                                            |                                      | Coc vs. Saline                                                                                                                                | t = 4.8                 | 10                                  | < 0.001****                                  | 2H             |
| Acute Cocaine + NAc LV miRNA qPCR                                                 | miR-495                                            | Two-way ANOVA                        | Virus                                                                                                                                         | F = 4.5                 | 1, 33                               | < 0.05*                                      | 3B             |
|                                                                                   |                                                    |                                      | Treatment                                                                                                                                     | F = 70.1                | 1, 33                               | < 0.0001****                                 |                |
|                                                                                   |                                                    |                                      | Virus x Treatment                                                                                                                             | F = 4.6                 | 1, 33                               | < 0.05*                                      |                |
|                                                                                   |                                                    | Post-Hoc Tukey HSD                   | LV-GFP Saline vs. LV-GFP Cocaine                                                                                                              | q = 4.2                 | 33                                  | < 0.05*                                      |                |
|                                                                                   |                                                    |                                      | LV-GFP Saline vs. LV-miR-495 Saline                                                                                                           | q = 6.1                 | 33                                  | < 0.001****                                  |                |
|                                                                                   |                                                    |                                      | LV-GFP Saline vs. LV-miR-495 Cocaine                                                                                                          | q = 6.0                 | 33                                  | < 0.001****                                  |                |
|                                                                                   | Bdnf-Pan                                           | Two-way ANOVA                        | Virus                                                                                                                                         | F = 14.2                | 1, 18                               | <0.01**                                      | 3C             |
|                                                                                   |                                                    |                                      | Treatment                                                                                                                                     | F = 12.5                | 1, 18                               | <0.01**                                      |                |
|                                                                                   |                                                    |                                      | Virus x Treatment                                                                                                                             | F = 10.2                | 1, 18                               | <0.01**                                      |                |
|                                                                                   |                                                    | Post-Hoc Tukey HSD                   | LV-GFP Saline vs. LV-GFP Cocaine                                                                                                              | q = 6.32                | 18                                  | <0.01**                                      |                |
|                                                                                   |                                                    |                                      | LV-GFP Saline vs. LV-miR-495 Saline                                                                                                           | q = 0.4935              | 18                                  | ns                                           |                |
|                                                                                   |                                                    |                                      | LV-GFP Saline vs. LV-miR-495 Cocaine                                                                                                          | q = 0.1959              | 18                                  | ns                                           |                |
| Bdnf-L                                                                            | Two-way ANOVA                                      | Virus                                | F = 15.9                                                                                                                                      | 1, 18                   | < 0.01**                            | 3D                                           |                |
|                                                                                   |                                                    | Treatment                            | F = 17.0                                                                                                                                      | 1, 18                   | < 0.001****                         |                                              |                |
|                                                                                   |                                                    | Virus x Treatment                    | F = 11.2                                                                                                                                      | 1, 18                   | < 0.001****                         |                                              |                |
|                                                                                   | Post-Hoc Tukey HSD                                 | LV-GFP Saline vs. LV-GFP Cocaine     | q = 6.955                                                                                                                                     | 18                      | < 0.001****                         |                                              |                |
|                                                                                   |                                                    | LV-GFP Saline vs. LV-miR-495 Saline  | q = 0.6878                                                                                                                                    | 18                      | ns                                  |                                              |                |
|                                                                                   |                                                    | LV-GFP Saline vs. LV-miR-495 Cocaine | q = 0.1288                                                                                                                                    | 18                      | ns                                  |                                              |                |
| Microarray confirmation by qPCR                                                   | miR-495<br>Bdnf<br>Camk2a<br>Arc<br>Stmn2<br>Gria3 | t test                               | LV-GFP vs. LV-miR-495                                                                                                                         | t = 15.8                | 4                                   | <0.01**                                      | 4C             |
|                                                                                   |                                                    |                                      | LV-GFP vs. LV-miR-495                                                                                                                         | t = 11.4                | 4                                   | <0.01**                                      |                |
|                                                                                   |                                                    |                                      | LV-GFP vs. LV-miR-495                                                                                                                         | t = 12.4                | 4                                   | <0.01**                                      |                |
|                                                                                   |                                                    |                                      | LV-GFP vs. LV-miR-495                                                                                                                         | t = 6.5                 | 4                                   | <0.05*                                       |                |
|                                                                                   |                                                    |                                      | LV-GFP vs. LV-miR-495                                                                                                                         | t = 4.9                 | 4                                   | <0.05*                                       |                |
|                                                                                   |                                                    |                                      | LV-GFP vs. LV-miR-495                                                                                                                         | t = 4.4                 | 4                                   | <0.05*                                       |                |
| Cocaine Intake Across Self-Administration                                         | Intake                                             | t test                               | SA1 vs. SA22                                                                                                                                  | t = 0.46                | 6.0 (Welch's correction)            | ns                                           | S5             |
| NAc miR-495 after Self-Administration                                             | miR-495 qPCR                                       | t-test                               | NAc Shell vs. NAc Core                                                                                                                        | t = 0.3                 | 15                                  | ns                                           | S6             |
| NAcSh miR-495 after Self-Administration                                           | miR-495 qPCR                                       | t test                               | Saline: SA1 vs. SA22                                                                                                                          | t = 0.84                | 6                                   | ns                                           | Data not shown |
|                                                                                   |                                                    | One-way ANOVA                        | Days of self-administration                                                                                                                   | F = 9.30                | 2, 17                               | <0.01**                                      |                |
|                                                                                   |                                                    | Tukey Post-Hoc                       | SA-22 vs. SA1                                                                                                                                 |                         |                                     | ns                                           |                |
|                                                                                   |                                                    | Trend Analysis                       | SA1 vs. Saline Yoked                                                                                                                          | F = 18.23               | 1, 17                               | <0.01**                                      |                |
| NAcC miR-495 after Self-Administration                                            | miR-495 qPCR                                       | t test                               | Saline: SA1 vs. SA22                                                                                                                          | t = 0.42                | 7                                   | ns                                           | Data not shown |
|                                                                                   |                                                    | One-way ANOVA                        | Days of self-administration                                                                                                                   | F = 0.47                | 2, 20                               | ns                                           |                |
| Cocaine Fixed Ratio 5                                                             | Active lever                                       | Two-way ANOVA                        | Virus                                                                                                                                         | F = 1.10                | 1, 20                               | ns                                           | S8             |
|                                                                                   |                                                    |                                      | Dose                                                                                                                                          | F = 30.43               | 1.4, 27.2 (Huynh-Feldt)             | < 0.01**                                     |                |
|                                                                                   | Virus x Dose                                       |                                      | F = 1.65                                                                                                                                      | 1.4, 27.2 (Huynh-Feldt) | ns                                  |                                              |                |
|                                                                                   | Intake                                             |                                      | F = 0.02                                                                                                                                      | 1, 20                   | ns                                  |                                              |                |
|                                                                                   | Dose                                               |                                      | F = 176.97                                                                                                                                    | 1.7, 34.1 (Huynh-Feldt) | < 0.01**                            |                                              |                |
|                                                                                   | Virus x Dose                                       |                                      | F = 0.85                                                                                                                                      | 1.7, 34.1 (Huynh-Feldt) | ns                                  |                                              |                |
| Cocaine Progressive Ratio                                                         | Active lever                                       | Two-way ANOVA                        | Virus                                                                                                                                         | F = 7.14                | 1, 20                               | <0.05*                                       | S9A, D         |
|                                                                                   |                                                    |                                      | Dose                                                                                                                                          | F = 8.98                | 3, 60                               | < 0.01**                                     |                |
|                                                                                   | Virus x Dose                                       |                                      | F = 2.23                                                                                                                                      | 3, 60                   | ns                                  |                                              |                |
|                                                                                   | Intake                                             |                                      | F = 5.55                                                                                                                                      | 1, 20                   | <0.05*                              |                                              |                |
|                                                                                   | Dose                                               |                                      | F = 13.70                                                                                                                                     | 2.2, 44.9 (Huynh-Feldt) | <0.01**                             |                                              |                |
|                                                                                   | Virus x Dose                                       |                                      | F = 0.65                                                                                                                                      | 2.2, 44.9 (Huynh-Feldt) | ns                                  |                                              |                |
| Active lever                                                                      | Intake                                             | Two-way ANOVA                        | Virus                                                                                                                                         | F = 0.01                | 1, 20                               | ns                                           | S9A            |
|                                                                                   |                                                    |                                      | Dose                                                                                                                                          | F = 1.37                | 1.6, 31.4 (Huynh-Feldt)             | ns                                           |                |
|                                                                                   |                                                    |                                      | Virus x Dose                                                                                                                                  | F = 0.47                | 1.6, 31.4 (Huynh-Feldt)             | ns                                           |                |
|                                                                                   |                                                    |                                      | Dose                                                                                                                                          | F = 1.16                | 1, 14                               | ns                                           |                |
|                                                                                   |                                                    |                                      | Day                                                                                                                                           | F = 4.08                | 6, 84                               | <0.01**                                      |                |
|                                                                                   |                                                    |                                      | Virus x Day                                                                                                                                   | F = 0.51                | 6, 84                               | ns                                           |                |
| Active lever                                                                      | Intake                                             | Two-way ANOVA                        | Virus                                                                                                                                         | F = 0.23                | 1, 14                               | ns                                           | S11            |
|                                                                                   |                                                    |                                      | Virus                                                                                                                                         | F = 0.23                | 1, 14                               | ns                                           |                |

|                                                          |                |                                   |                                               |                                                                                                                          |                          |                       |                |                 |
|----------------------------------------------------------|----------------|-----------------------------------|-----------------------------------------------|--------------------------------------------------------------------------------------------------------------------------|--------------------------|-----------------------|----------------|-----------------|
| Food pellet Fixed ratio 5                                | Intake         | Two-way ANOVA                     | Day                                           | F = 8.30                                                                                                                 | 6, 84                    | <0.01**               | Data not shown |                 |
|                                                          | Inactive lever |                                   | Virus x Day                                   | F = 1.84                                                                                                                 | 6, 84                    | ns                    |                |                 |
| Food Restricted progressive ratio                        | Active lever   | Two-way ANOVA                     | Virus                                         | F = 0.02                                                                                                                 | 1, 14                    | ns                    | 5L, S12        |                 |
|                                                          |                |                                   | Food Restriction                              | F = 55.26                                                                                                                | 1, 14                    | <0.001***             |                |                 |
|                                                          | Intake         | Two-way ANOVA                     | Virus x Food Restriction                      | F = 0.003                                                                                                                | 1, 14                    | ns                    | <0.001***      |                 |
|                                                          |                |                                   | Virus                                         | F = 0.06                                                                                                                 | 1, 14                    | ns                    |                |                 |
|                                                          | Inactive lever | Post-hoc tests for simple effects | Food Restriction                              | F = 45.97                                                                                                                | 1, 14                    | ns                    | <0.05*         |                 |
|                                                          |                |                                   | Virus x Food Restriction                      | F = 0.06                                                                                                                 | 1, 14                    | ns                    |                |                 |
|                                                          |                |                                   | Virus                                         | F = 0.01                                                                                                                 | 1, 14                    | ns                    |                |                 |
|                                                          |                |                                   | Food Restriction                              | F = 0.24                                                                                                                 | 1, 14                    | ns                    |                |                 |
|                                                          |                |                                   |                                               | Virus x Food Restriction                                                                                                 | F = 5.62                 | 1, 14                 | ns             | Data not shown  |
|                                                          |                |                                   |                                               | Group difference at each food restriction condition / change across each food restriction condition for each virus group |                          |                       |                |                 |
| Pre-Extinction SA Baseline                               | Active lever   | T test                            |                                               | t = 0.7                                                                                                                  | 17                       | ns                    | 5G             |                 |
| Extinction                                               | Active lever   | Two-way ANOVA                     | Virus                                         | F = 3.19                                                                                                                 | 1, 20                    | 0.09                  | 5G             |                 |
|                                                          |                | Day                               | F = 19.36                                     | 5.0, 100.9 (Huynh-Feldt)                                                                                                 | <0.001***                |                       |                |                 |
|                                                          | Inactive lever | Post-hoc tests for simple effects | Virus x Day                                   | F = 3.17                                                                                                                 | 5.0, 100.9 (Huynh-Feldt) | <0.01**               | S9B            |                 |
|                                                          |                | Two-way ANOVA                     | Virus                                         | F = 1.46                                                                                                                 | 1, 20                    | <0.05* 1st 3 sessions |                |                 |
|                                                          |                |                                   | Day                                           | F = 2.90                                                                                                                 | 3.3, 66.7 (Huynh-Feldt)  | <0.05*                |                |                 |
|                                                          |                |                                   | Virus x Day                                   | F = 1.48                                                                                                                 | 3.3, 66.7 (Huynh-Feldt)  | ns                    |                |                 |
| Cue Reinstatement                                        | Active lever   | Two-way ANOVA                     | Virus                                         | F = 2.54                                                                                                                 | 1, 20                    | ns                    | S10            |                 |
|                                                          |                |                                   | Day                                           | F = 56.17                                                                                                                | 1, 20                    | <0.001**              |                |                 |
|                                                          | Inactive lever |                                   | Virus x Day                                   | F = 2.48                                                                                                                 | 1, 20                    | ns                    | S8C            |                 |
|                                                          |                |                                   | Virus                                         | F = 0.73                                                                                                                 | 1, 20                    | ns                    |                |                 |
|                                                          |                |                                   | Day                                           | F = 1.73                                                                                                                 | 1, 20                    | ns                    |                |                 |
|                                                          |                |                                   | Virus x Day                                   | F = 0.93                                                                                                                 | 1, 20                    | ns                    |                |                 |
| Cocaine Reinstatement                                    | Active lever   | Two-way ANOVA                     | Virus                                         | F = 6.55                                                                                                                 | 1, 20                    | <0.05*                | 5H             |                 |
|                                                          |                | Day                               | F = 38.35                                     | 1, 20                                                                                                                    | <0.001***                |                       |                |                 |
|                                                          |                | Virus x Day                       | F = 6.32                                      | 1, 20                                                                                                                    | <0.05*                   |                       |                |                 |
|                                                          | Inactive lever | Post-hoc tests for simple effects | Group difference during baseline and test day |                                                                                                                          | Virus                    | F = 1.55              | 1, 20          | <0.05* test day |
|                                                          |                | Two-way ANOVA                     | Day                                           | F = 1.55                                                                                                                 | 1, 20                    | ns                    | S9D            |                 |
|                                                          |                | Virus x Day                       | F = 1.35                                      | 1, 20                                                                                                                    | ns                       |                       |                |                 |
| NAcSh miRNA and mRNA levels following behavioral testing | miR-495 qPCR   | t-test                            | LV-GFP vs. LV-miR-495                         | t = 3.70                                                                                                                 | 6                        | <0.05*                | 5C             |                 |
|                                                          | Camk2a qPCR    | t-test                            | LV-GFP vs. LV-miR-495                         | t = 3.33                                                                                                                 | 12                       | <0.01**               | 5I             |                 |
|                                                          | Bdnf-L qPCR    | t-test                            | LV-GFP vs. LV-miR-495                         | t = 3.2                                                                                                                  | 10                       | <0.01**               | 5J             |                 |
|                                                          | Bdnf-Pan qPCR  | t-test                            | LV-GFP vs. LV-miR-495                         | t = 3.2                                                                                                                  | 11                       | <0.01**               | 5K             |                 |
|                                                          |                |                                   |                                               |                                                                                                                          |                          |                       |                |                 |
